# Supplementary material for: A critical review of the long-term disability outcomes following hip fracture
Source: BMC Geriatr. 2016 Sep 2;16(1):158. doi: 10.1186/s12877-016-0332-0 (PMC5010762; doi:10.1186/s12877-016-0332-0)
Supplement: Additional file 1: Table S1. — Outcomes from studies reporting activity, participation and accommodation outcomes at multiple follow-up times after hip fracture. Table S2. Medium to long-term functional outcomes for hip fracture patients in comparison to pre-fracture baseline, from prospective population-based cohort studies. Table S3. Medium to long-term function outcomes for hip fracture patients from studies reporting outcomes for those living in residential care (percentage of survivors). Table S4. Additional data on time to recovery of function following hip fracture as estimated from cohort studies. Table S5. Participation outcomes at single time-points post-fracture for countries or outcomes otherwise poorly represented. (PDF 348 kb) [file 12877_2016_332_MOESM1_ESM.pdf]

**Supplementary Table 1** Outcomes from studies reporting activity, participation and accommodation outcomes at multiple follow-up times after hip fracture

| Study                      | Outcome                                     | Pre-fracture | Follow-up time   |        |         |               |           |            |
|----------------------------|---------------------------------------------|--------------|------------------|--------|---------|---------------|-----------|------------|
|                            |                                             |              | 3-5 mo           | 6-9 mo | 9-18 mo | 19 mo – 2 yrs | 3-5 years | 6-10 years |
| <b>Activity - Mobility</b> |                                             |              |                  |        |         |               |           |            |
| Borgquist 1990             | Walking (% survivors)                       | 95%          | 73%              |        | 80%     |               | 80%       | 76%        |
| Griffin 2015               | Walking regularly:                          |              |                  |        |         |               |           |            |
|                            | indoors without aids ≤80 years              | 66%          | 37%              |        | 49%     |               |           |            |
|                            | indoors without aids >80 years              | 46%          | 14%              |        | 20%     |               |           |            |
|                            | outdoors without aids ≤80 years             | 51%          | 18%              |        | 26%     |               |           |            |
|                            | outdoors without aids >80 years             | 29%          | 6%               |        | 8%      |               |           |            |
| Kitamura 1998              | Walking alone outdoors (± assistive device) | 68%          | 51%              |        | 58%     | 58%           |           |            |
|                            | Walk alone outdoors + helper                | 8%           | 13%              |        | 10%     | 8%            |           |            |
|                            | Walk alone indoors (± assistive device)     | 11%          | 10%              |        | 7%      | 9%            |           |            |
|                            | Walk alone indoors + helper                 | 8%           | 10%              |        | 8%      | 6%            |           |            |
|                            | Sit/wheelchair                              | 3%           | 11%              |        | 9%      | 11%           |           |            |
|                            | Bedridden                                   | 2%           | 5%               |        | 8%      | 8%            |           |            |
| Tsuboi 1998                | Walking alone outdoors (± assistive device) | 68%          | 51%              |        | 56%     |               |           |            |
| Magaziner 1990             | Walk independently or with 1 stick          | 87%          | 26% <sup>2</sup> |        | 54%     |               |           |            |
| Magaziner 2003             | Walking 3m without assistance               | 74%          |                  |        | 46%     | 47%           |           |            |
| Neuman                     | New total locomotion dependence             |              | 28%              |        | 27%     |               |           |            |
| Samuelsson 2009            | Walking independent/1 stick                 | 51%          | 25%              |        |         | 28%           |           |            |
|                            | 2 sticks/frame                              | 45%          | 61%              |        |         | 54%           |           |            |
|                            | Non-walking                                 | 4%           | 15%              |        |         | 18%           |           |            |

| Study                                              | Outcome                                                                                                                                                                        | Pre-fracture                        | Follow-up time           |                                     |                                     |                          |                          |
|----------------------------------------------------|--------------------------------------------------------------------------------------------------------------------------------------------------------------------------------|-------------------------------------|--------------------------|-------------------------------------|-------------------------------------|--------------------------|--------------------------|
|                                                    |                                                                                                                                                                                |                                     | 3-5 mo                   | 6-9 mo                              | 9-18 mo                             | 19 mo – 2 yrs            | 3-5 years                |
| <b>Activity - Composite measures of Basic ADLs</b> |                                                                                                                                                                                |                                     |                          |                                     |                                     |                          |                          |
| Doshi 2014                                         | Mean MBI (those surgically treated)                                                                                                                                            | 91.2%                               |                          | 80.8%                               | 87.0%                               |                          |                          |
| Koval 1998                                         | Mean functional recovery score (composite measure of mobility 33%, BADLs 44% and IADLs 23%)<br>Mean functional recovery (functional recovery score as % of pre-fracture score) | 83.8 (range 8.25-100)               | 77%                      | 86%                                 | 86%                                 |                          |                          |
| Magaziner 1990                                     | Fully independent in Basic ADLs                                                                                                                                                | 70%                                 | 14% <sup>2</sup>         |                                     | 40%                                 |                          |                          |
| Norton 2000                                        | Independent (% survivors)                                                                                                                                                      | 62%                                 |                          |                                     | 44%                                 |                          |                          |
| Miller 2009                                        | Lower extremity ADLs (no. of tasks requiring assistance) (SD)<br>No falls<br>1 fall<br>>1 fall                                                                                 | 4.4 (3.4)<br>4.8 (3.4)<br>5.6 (3.2) |                          | 7.0 (3.3)<br>8.0 (2.7)<br>8.7 (3.0) | 6.9 (3.4)<br>6.7 (2.9)<br>9.2 (2.9) |                          |                          |
| Samuelsson 2009                                    | ADL-independent                                                                                                                                                                | 74%                                 |                          | 58%                                 | 59%                                 |                          |                          |
| <b>Activity - Self-care</b>                        |                                                                                                                                                                                |                                     |                          |                                     |                                     |                          |                          |
| Borgquist 1990                                     | Dressing/personal hygiene                                                                                                                                                      | 89%                                 | 83%                      |                                     | 88%                                 | 83%                      | 92%                      |
| Magaziner 2003                                     | Requiring grooming assistance (SE)                                                                                                                                             | 78% (1%)                            |                          |                                     | 17% (2%)                            | 18% (2%)                 |                          |
| <b>Participation – Composite measures of IADLs</b> |                                                                                                                                                                                |                                     |                          |                                     |                                     |                          |                          |
| Magaziner 1990                                     | Fully independent in IADLs                                                                                                                                                     | 34%                                 | 4% <sup>2</sup>          |                                     | 14%                                 |                          |                          |
| <b>Participation – domestic life</b>               |                                                                                                                                                                                |                                     |                          |                                     |                                     |                          |                          |
| Borgquist 1990                                     | Cooking/washing dishes<br>Cleaning/laundry<br>Shopping<br>Need for social services                                                                                             | 74%<br>59%<br>67%<br>-              | 63%<br>47%<br>39%<br>33% |                                     | 60%<br>48%<br>53%<br>32%            | 62%<br>53%<br>52%<br>23% | 70%<br>54%<br>68%<br>35% |

| Study                                                   | Outcome                                                 | Pre-fracture | Follow-up time |             |             |               |           |            |
|---------------------------------------------------------|---------------------------------------------------------|--------------|----------------|-------------|-------------|---------------|-----------|------------|
|                                                         |                                                         |              | 3-5 mo         | 6-9 mo      | 9-18 mo     | 19 mo – 2 yrs | 3-5 years | 6-10 years |
| <b>Participation – community, social and civic life</b> |                                                         |              |                |             |             |               |           |            |
| Borgquist 1990                                          | Visiting someone monthly (those admitted form own home) | 74%          |                |             |             |               | 67%       | 76%        |
| Miller 2009                                             | No. social activities over 2 weeks (SD)                 |              |                |             |             |               |           |            |
|                                                         | Overall                                                 |              |                | 9.2 (10.0)  | 8.9 (SD)    |               |           |            |
|                                                         | Those with no falls over 6 months                       | 10.5 (8.7)   |                | 10.2 (10.0) | 10.1 (10.2) |               |           |            |
|                                                         | 1 fall over 6 months                                    | 10.9 (12.6)  |                | 8.9 (11.1)  | 8.5 (10.9)  |               |           |            |
|                                                         | ≥2 falls over 6 months                                  | 6.5 (5.3)    |                | 3.5 (5.7)   | 3.9 (5.0)   |               |           |            |
| <b>Accommodation</b>                                    |                                                         |              |                |             |             |               |           |            |
| Borgquist 1990                                          | Own home (% total)                                      |              | 79%            |             | 76%         |               | 43%       | 30%        |
|                                                         | Old peoples home                                        |              | 6%             |             | 5%          |               | 9%        | 4%         |
|                                                         | Nursing home                                            |              | 5%             |             | 8%          |               | 5%        | 2%         |
|                                                         | Hospital                                                |              | 7%             |             | 0%          |               | 0%        | 0%         |
| Kitamura 1998                                           | Own home                                                | 84%          | 76%            |             | 86%         | 85%           |           |            |
|                                                         | Hospital                                                | 11%          | 18%            |             | 7%          | 8%            |           |            |
|                                                         | Residential care                                        | 5%           | 6%             |             | 7%          | 7%            |           |            |
| Tsuboi 2007                                             | Own home                                                | 84%          | 60%            |             | 81%         |               |           | 86%        |
| Samuelsson 2009                                         | Own home                                                |              |                |             |             |               |           |            |
|                                                         | Women                                                   | 77%          | 79%            |             | 63%         |               |           |            |
|                                                         | Men                                                     | 82%          | 86%            |             | 75%         |               |           |            |

<sup>1</sup> Data also reported by age groups for walking regularly with one aid, with two aids or frame and not walking

<sup>2</sup>Two months post-discharge

Abbreviations: ADL = activities of daily living, BOAS = Brazil Old Age Schedule, LTC = long term care, MBI = modified Barthel Index, mo = months, TICS = Telephone Interview to Assess Cognitive Status, yrs = years

**Supplementary Table 2** Medium to long-term functional outcomes for hip fracture patients in comparison to pre-fracture baseline, from prospective population-based cohort studies

| Study                       | Outcome                                                                     | Pre-fracture | Follow-up time |             |
|-----------------------------|-----------------------------------------------------------------------------|--------------|----------------|-------------|
|                             |                                                                             |              | 3-6 mo         | 1 – 2.5 yrs |
| <b>Activity - Mobility</b>  |                                                                             |              |                |             |
| Bentler 2009                | Mean no. abilities with difficulty                                          | 1.70         |                | 2.63        |
| Marottoli 1992              | Walking across room independently                                           | 75%          | 15%            |             |
|                             | Walk across room ± mechanical assistance                                    | 96%          | 74%            |             |
|                             | transfer independently                                                      | 90%          | 32%            |             |
|                             | transfer ± mechanical assistance                                            | 96%          | 68%            |             |
|                             | Climb flight of stairs independently                                        | 63%          | 8%             |             |
|                             | Walk half mile independently                                                | 41%          | 6%             |             |
| Wolinsky 1997               | Mean increase in no. limitations:                                           |              |                |             |
|                             | Lower body                                                                  |              |                | 1.75        |
|                             | Upper body                                                                  |              |                | 0.50        |
|                             | Mean adjusted increase in no. limitations due to hip fracture:              |              |                |             |
|                             | Lower body                                                                  |              |                | 0.93        |
|                             | Upper body                                                                  |              |                | 0.26        |
| Bentler 2009                | Mean no. of functional abilities with difficulty                            | 0.67         |                | 1.54        |
|                             | Mean increase in no ADLs with difficulty                                    |              |                | 0.88        |
| Wolinsky 1997               | Mean increase in no. ADL limitations                                        |              |                | 2.08        |
|                             | Mean adjusted increase in no. limitations due to hip fracture               |              |                | 1.12        |
| <b>Activity - Self-care</b> |                                                                             |              |                |             |
| Marottoli 1994              | Dressing independently                                                      | 86%          | 49%            |             |
|                             | Dressing ± mechanical assistance                                            | 86%          | 51%            |             |
|                             | <i>For those who could perform 4 or 5 items independently at baseline:</i>  |              |                |             |
|                             | Dressing independently                                                      | 99%          | 60%            |             |
|                             | Dressing ± mechanical assistance                                            | 99%          | 62%            |             |
|                             | <b>Participation – domestic life</b>                                        |              |                |             |
| Wolinsky 1997               | Mean increase in no. household ADL limitations                              |              |                | 0.89        |
|                             | Mean adjusted increase in no. household ADL limitations due to hip fracture |              |                | 0.35        |

| Study                                                     | Outcome                                                                   | Pre-fracture | Follow-up time |             |
|-----------------------------------------------------------|---------------------------------------------------------------------------|--------------|----------------|-------------|
|                                                           |                                                                           |              | 3-6 mo         | 1 – 2.5 yrs |
| <b><i>Participation – Composite measures of IADLS</i></b> |                                                                           |              |                |             |
| Bentler 2009                                              | Mean no. functional abilities with difficulty                             | 0.65         |                | 1.32        |
| Wolinsky 1997                                             | Mean increase in no. advanced ADL limitations                             |              |                | 0.44        |
|                                                           | Mean adjusted increase in no. advanced limitations due to hip fracture    |              |                | 0.21        |
| <b><i>Health condition</i></b>                            |                                                                           |              |                |             |
| Bentler 2009                                              | Mean self-reported health status                                          | 60.6         |                | 56.1        |
|                                                           | Mean cognition (TICS/15)                                                  | 12.9         |                | 12.6        |
| <b><i>Accommodation</i></b>                               |                                                                           |              |                |             |
| Marottoli 1994                                            | Insitutionalised during 6 months post-fracture (% total)<br>(% survivors) |              | 29%            |             |
|                                                           |                                                                           |              | 23%            |             |

**Supplementary Table 3** Medium to long-term function outcomes for hip fracture patients from studies reporting outcomes for those living in residential care (percentage of survivors)

| Study                                              | Outcome                                                      | Pre-fracture residence | Pre-fracture | 4 months | 6 months    | 1 year |
|----------------------------------------------------|--------------------------------------------------------------|------------------------|--------------|----------|-------------|--------|
| <b>Activity - Mobility</b>                         |                                                              |                        |              |          |             |        |
| Crotty 2000                                        | Independent ambulation                                       | Residential care       | 61%          | 32%      |             |        |
|                                                    |                                                              | Home                   | 96%          | 70%      |             |        |
|                                                    | Assistance for ambulation                                    | Residential care       | 34%          | 32%      |             |        |
|                                                    |                                                              | Home                   | 4%           | 24%      |             |        |
|                                                    | Unable to ambulate                                           | Residential care       | 5%           | 36%      |             |        |
|                                                    |                                                              | Home                   | 0%           | 6%       |             |        |
| Beaupre 2007                                       | Walking without assistive devices                            | Residential care       | 39%          |          | 4%          |        |
|                                                    |                                                              | Community              | 61%          |          | 26%         |        |
|                                                    | Walking ± assistive devices                                  | Residential care       | 79%          |          | 45%         |        |
|                                                    |                                                              | Community              | 97%          |          | 89%         |        |
|                                                    | Chair transfers                                              | Residential care       | 80%          |          | 47%         |        |
|                                                    |                                                              | Community              | 97%          |          | 92%         |        |
|                                                    | Toilet transfers                                             | Residential care       | 44%          |          | 15%         |        |
|                                                    |                                                              | Community              | 96%          |          | 88%         |        |
|                                                    | Stair climbing                                               | Residential care       | 56%          |          | 15%         |        |
|                                                    |                                                              | Community              | 92%          |          | 77%         |        |
| Neuman 2014                                        | New total locomotion dependence                              | Nursing home           |              | 27.8%    |             | 26.5%  |
| <b>Activity - Composite measures of Basic ADLs</b> |                                                              |                        |              |          |             |        |
| Beaupre 2007                                       | Adjusted relative reduction in pre-fracture function (95%CI) | Residential care       |              |          | 33% (27-41) |        |
|                                                    |                                                              | Community              |              |          | 12% (8-15)  |        |
| Crotty 2000                                        | Independent in all BADLs                                     | Residential care       | 3%           | 2%       |             |        |
|                                                    |                                                              | Home                   | 46%          | 28%      |             |        |
| <b>Participation – self-care</b>                   |                                                              |                        |              |          |             |        |
| Beaupre 2007                                       | Dressing                                                     | Residential care       | 35%          |          | 9%          |        |
|                                                    |                                                              | Community              | 88%          |          | 73%         |        |
|                                                    | Hygiene                                                      | Residential care       | 51%          |          | 22%         |        |
|                                                    |                                                              | Community              | 94%          |          | 90%         |        |
|                                                    | Bathing                                                      | Residential care       | 9%           |          | 1%          |        |
|                                                    |                                                              | Community              | 71%          |          | 48%         |        |
|                                                    | Feeding                                                      | Residential care       | 59%          |          | 43%         |        |
|                                                    |                                                              |                        |              |          |             |        |

|                       |                               |                  |     |     |     |
|-----------------------|-------------------------------|------------------|-----|-----|-----|
|                       |                               | Community        | 94% |     | 89% |
|                       | Managing bowel continence     | Residential care | 52% |     | 25% |
|                       |                               | Community        | 88% |     | 85% |
|                       | Managing bladder continence   | Residential care | 36% |     | 15% |
|                       |                               | Community        | 74% |     | 75% |
| <b>Accommodations</b> |                               |                  |     |     |     |
| Crotty 2000           | Admitted to higher level care | Residential care |     | 16% |     |
|                       |                               | Community        |     | 14% |     |

**Supplementary Table 4** Additional data on time to recovery of function following hip fracture as estimated from cohort studies

| Study          | Outcome Measure                                                                                                                 | Function                                         | Outcome     |
|----------------|---------------------------------------------------------------------------------------------------------------------------------|--------------------------------------------------|-------------|
| Magaziner 1990 | Patients recovering or experiencing a decline in ability over the period 6-12 months post-discharge                             | <b>Activity- mobility</b>                        |             |
|                |                                                                                                                                 | recover previous walking ability                 | 10.5%       |
|                |                                                                                                                                 | decline in walking ability                       | 10.1%       |
|                |                                                                                                                                 | <b>Activity – composite measures of BADL</b>     |             |
|                |                                                                                                                                 | improving $\geq 2$ points in BADLs               | 12.9%       |
|                |                                                                                                                                 | declining $\geq 2$ points in BADLs               | 14.3%       |
|                |                                                                                                                                 | <b>Participation – composite measure of IADL</b> |             |
|                |                                                                                                                                 | improving $\geq 2$ points in IADLs               | 20.9%       |
| Magaziner 2000 | Recuperation time estimated using longitudinal analysis to estimate the point in time at which additional recovery not detected | declining $\geq 2$ points in IADLs               | 19.5%       |
|                |                                                                                                                                 | <b>Activity- mobility</b>                        |             |
|                |                                                                                                                                 | chair rise speed                                 | 9.9 months  |
|                |                                                                                                                                 | walking speed                                    | 10.8 months |
|                |                                                                                                                                 | walking 3m without assistance                    | 13.1 months |
|                |                                                                                                                                 | <b>Activity – composite measures of BADL</b>     |             |
|                |                                                                                                                                 | upper extremity ADLs                             | 4.3 months  |
|                |                                                                                                                                 | lower extremity ADLs                             | 11.2 months |
|                |                                                                                                                                 | <b>Health condition</b>                          |             |
|                |                                                                                                                                 | Depressive symptoms                              | 3.9 months  |
|                |                                                                                                                                 | cognitive status                                 | 4.4 months  |

**Supplementary Table 5** Participation outcomes at single time-points post-fracture for countries or outcomes otherwise poorly represented.

| Study                                | Outcome                            | Pre-fracture | Follow-up time<br>1-2 yrs | 2-3 yrs |
|--------------------------------------|------------------------------------|--------------|---------------------------|---------|
| <b>Mobility</b>                      |                                    |              |                           |         |
| Suriyawongpaisal 2003                | Walking with support               | 1.2%         | 14%                       |         |
|                                      | Use wheelchair                     | 1.2%         | 23.2%                     |         |
|                                      | Transfer assisted                  | 0.8%         | 11.2%                     |         |
| <b>Self-care</b>                     |                                    |              |                           |         |
| Suriyawongpaisal 2003                | Bathing assisted                   | 0.8%         | 11.2%                     |         |
|                                      | Tooth-brushing assisted            | 0            | 4%                        |         |
|                                      | Dressing assisted                  | 1.2%         | 10%                       |         |
|                                      | Feeding assisted                   | 0            | 4.8%                      |         |
|                                      | Toileting assisted                 | 0.8%         | 21.6%                     |         |
|                                      | Fecal incontinence                 | 0            | 3.2%                      |         |
|                                      | Urinary incontinence               | 1.6%         | 6.8%                      |         |
| Wang 2015                            | Daily life self-care (% survivors) |              |                           |         |
|                                      | Independent                        |              |                           | 59.4%   |
|                                      | Partially disabled                 |              |                           | 36.0%   |
|                                      | Disabled                           |              |                           | 4.6%    |
| <b>Participation – domestic life</b> |                                    |              |                           |         |
| Keene 1993                           | Retain unaided mobility            |              | 40%                       |         |
|                                      | Shopping (% survivors)             | 54%          | 33%                       |         |
|                                      | Return to own home (%total)        |              | 43.5%                     |         |
|                                      | Residential care                   | 21.4%        | 19.9%                     |         |
